# Supplementary material for: Is hydroxypyridonate 3,4,3-LI(1,2-HOPO) a good competitor of fetuin for uranyl metabolism?
Source: Royal Society of Chemistry journal article supplement (doi:10.1039/c8mt00272j), 2018-12-11
Supplement: c8mt00272j1.pdf [file c8mt00272j1.pdf]

## Is hydroxypyridonate 3,4,3-LI(1,2-HOPO) a good competitor of fetuin for uranyl metabolism?

### Supplementary Information

#### I. Determination of apparent affinity constant

For each HOPO concentration, the free part of  $\text{UO}_2^{2+}$  has been quantified by measuring the corresponding SPR signals in duplicates. From these signals, and thanks to a calibration curve ( $\text{SPR signal} = f(\text{UO}_2^{2+})$ ) previously established within the same experiment, the unbound  $\text{UO}_2^{2+}$  could be calculated. A binding isotherm has been obtained by plotting the response SPR signal (Resonance Units, RU) corresponding to the unbound  $\text{UO}_2^{2+}$  versus the ligand concentration (here  $\log[\text{HOPO}]$ ). This gives a sigmoid curve that could be fitted to a four parameter logistic curve to calculate the apparent  $K_D$ . These parameters are the maximum response corresponding to 50 nM  $\text{UO}_2^{2+}$ ), the minimum response corresponding to highest HOPO concentration leading to total  $\text{UO}_2^{2+}$  consumption, the slope and the inflexion point (see Table below and reference [15] for experimental details). This point corresponds to 50 % of  $\text{UO}_2^{2+}$  occupancy, thus giving the apparent  $K_D$ .

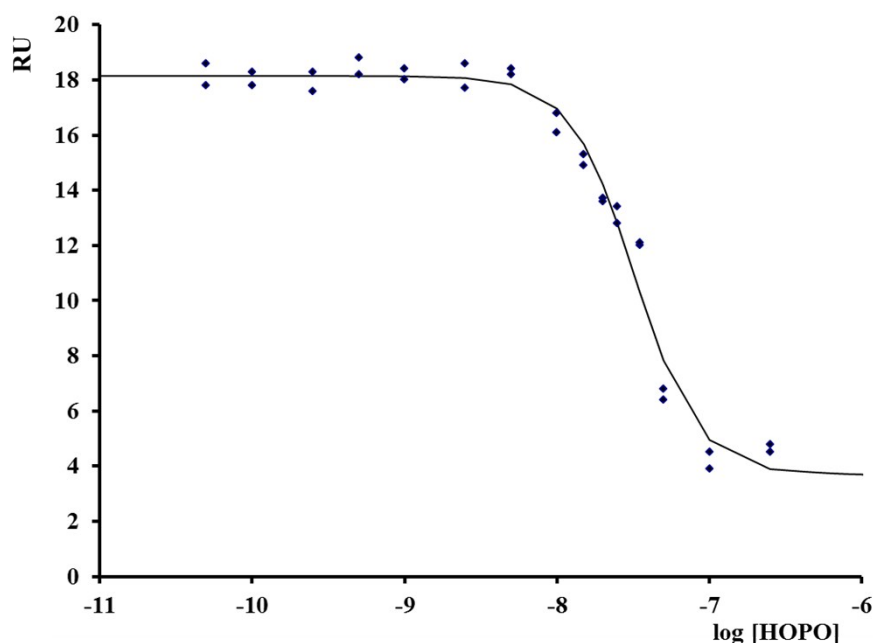

**Figure S1.** Determination of the apparent  $K_D$  of HOPO for  $\text{UO}_2^{2+}$  by SPR. Uranyl ( $0.5 \times 10^{-7}$  M) in TRIS buffer and  $\text{Na}_2\text{CO}_3$  ( $5 \times 10^{-6}$  M) was contacted with varied HOPO concentrations from  $0.05$  to  $250 \times 10^{-9}$  M and in duplicates (diamonds). The curve of the binding isotherm (continuous black line) is fitted to a four parameter logistic curve. The parameters of this curve are given in the table

1 below. The apparent  $K_D$  of HOPO is deduced from the HOPO concentration giving 50 % of signal (i.e 50% occupancy).

**Table S1.** Best fit parameters for the binding isotherm of uranyl with HOPO

|                          |                  |                                                         |
|--------------------------|------------------|---------------------------------------------------------|
| MIN (RU)                 | $3.7 \pm 0.2$    |                                                         |
| MAX (RU)                 | $18.1 \pm 0.3$   | <b><math>K_D</math> (50% signal)</b>                    |
| Inflexion point<br>(log) | $-7.49 \pm 0.03$ | <b><math>32 \pm 0.3 \times 10^{-9} \text{ M}</math></b> |
| Slope                    | 2.07             |                                                         |

## II. Titration of HOPO by uranyl; UV-Vis spectroscopy

In order to further define the stoichiometry of the  $\text{UO}_2^{2+}$ -HOPO complex, titration of HOPO by uranyl has been performed at  $22 \pm 2$  °C. The evolution of the HOPO UV-Vis spectra is presented (Figure S2) within the 250-500 nm range. The aquo-ion of  $\text{UO}_2^{2+}$  has a negligible absorption between within this range. HOPO at pH 7.4 presents a maximum absorbance at  $\lambda = 328$  nm ( $\epsilon = 20.3 \text{ L.mol}^{-1}.\text{cm}^{-1}$ ).

Changes on the UV-Vis spectra were followed for successive additions of 0.1 equivalents of  $\text{UO}_2^{2+}$  from 0 up to 2  $\text{UO}_2^{2+}$  equivalents, and for additions of 0.5 equivalents up to 4 equivalents. The first successive additions from 0 to 2  $\text{UO}_2^{2+}$  equivalents led to a decrease of the 328 nm signal associated with a blue shift of the wavelength from 328 to 317 nm for 1 equivalent, and then to 314 nm for 2 equivalents. The ligand band at 328 nm is blue shifted upon the successive  $\text{UO}_2^{2+}$  addition because the  $\pi - \pi^*$  transition is affected by the complexation with uranyl. After this 2:1 ratio, the absorption increase at 314 and 328 nm remain proportional to  $\text{UO}_2^{2+}$  additions without modification of the wavelength maximum.

The ratio of absorbance at 328 over 314 nm decreases with a single slope up to 2  $\text{UO}_2^{2+}$  equivalents where a clear breakpoint is observed, followed then by a plateau. (Figure S2, insert). Knowingly, HOPO is an octadentate chelator composed of a spermine backbone coupled to four hydroxypyridinone groups for metal binding and the nature of  $\text{UO}_2^{2+}$ -ligand complex formation comes to occupy in equatorial plane, that define HOPO as having four potential bidentate hydroxypyridinone rings for uranyl complexation.

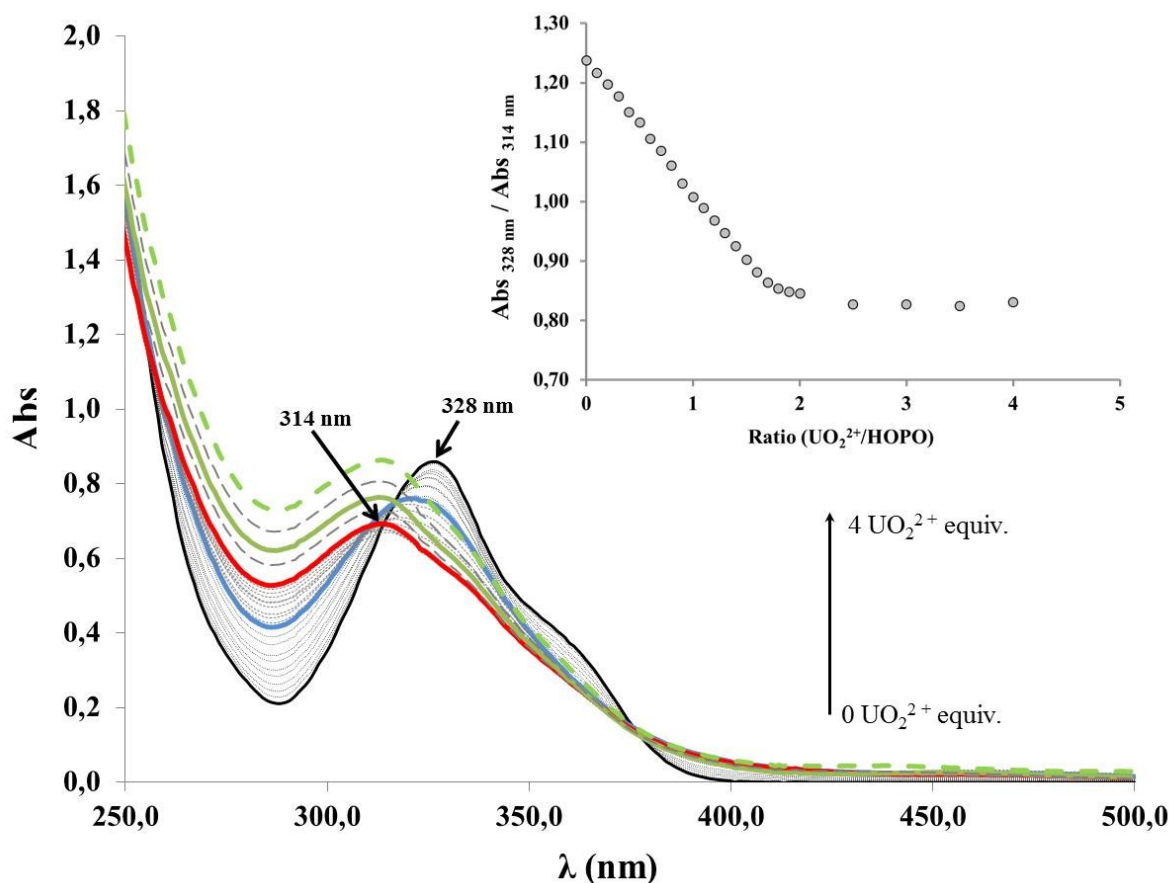

**Figure S2.** UV-vis titration of HOPO by  $\text{UO}_2^{2+}$ . Evolution of HOPO spectra ( $5 \times 10^{-5}$  M in TRIS buffer at  $22 \pm 2$  °C upon  $\text{UO}_2^{2+}$  additions. Successive additions of 0.1  $\text{UO}_2^{2+}$  equivalents from 0 (continuous black line) to 1 (continuous blue line) and 2 equivalents (continuous red line); then additions of 0.5 equivalents from 2 to 3 (continuous green line) and 4 equivalents (dashed green line). Insert: evolution of the absorbance ratio at 328 vs 314 nm (wavelengths corresponding to the 2 black arrows on the spectra) upon  $\text{UO}_2^{2+}$  additions.

### III. EXAFS data analysis

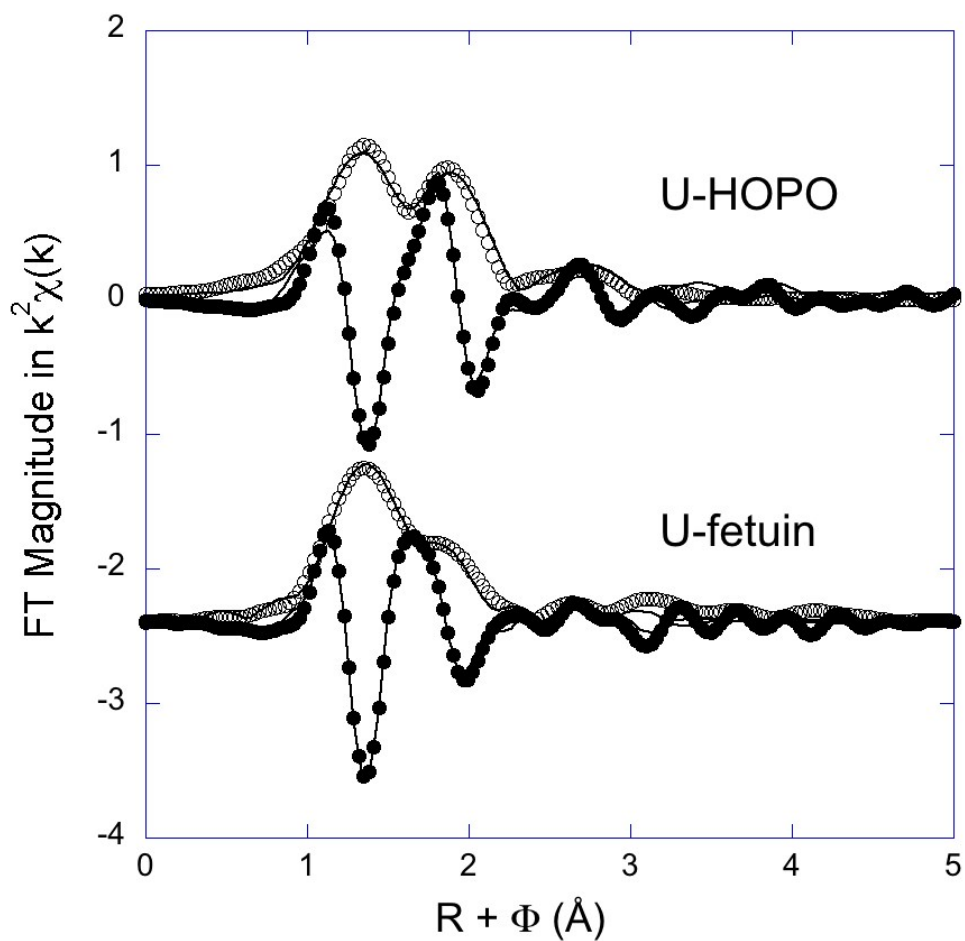

**Figure S3.** Moduli and imaginary parts of the Fourier transforms of the EXAFS spectra of  $\text{UO}_2^{2+}$ -HOPO and  $\text{UO}_2^{2+}$ -fetuin (U- for clarity in the Figure) at pH = 6.0. Black curve = experiment, black dots = fit of the imaginary part, empty dots = fit of the modulus.

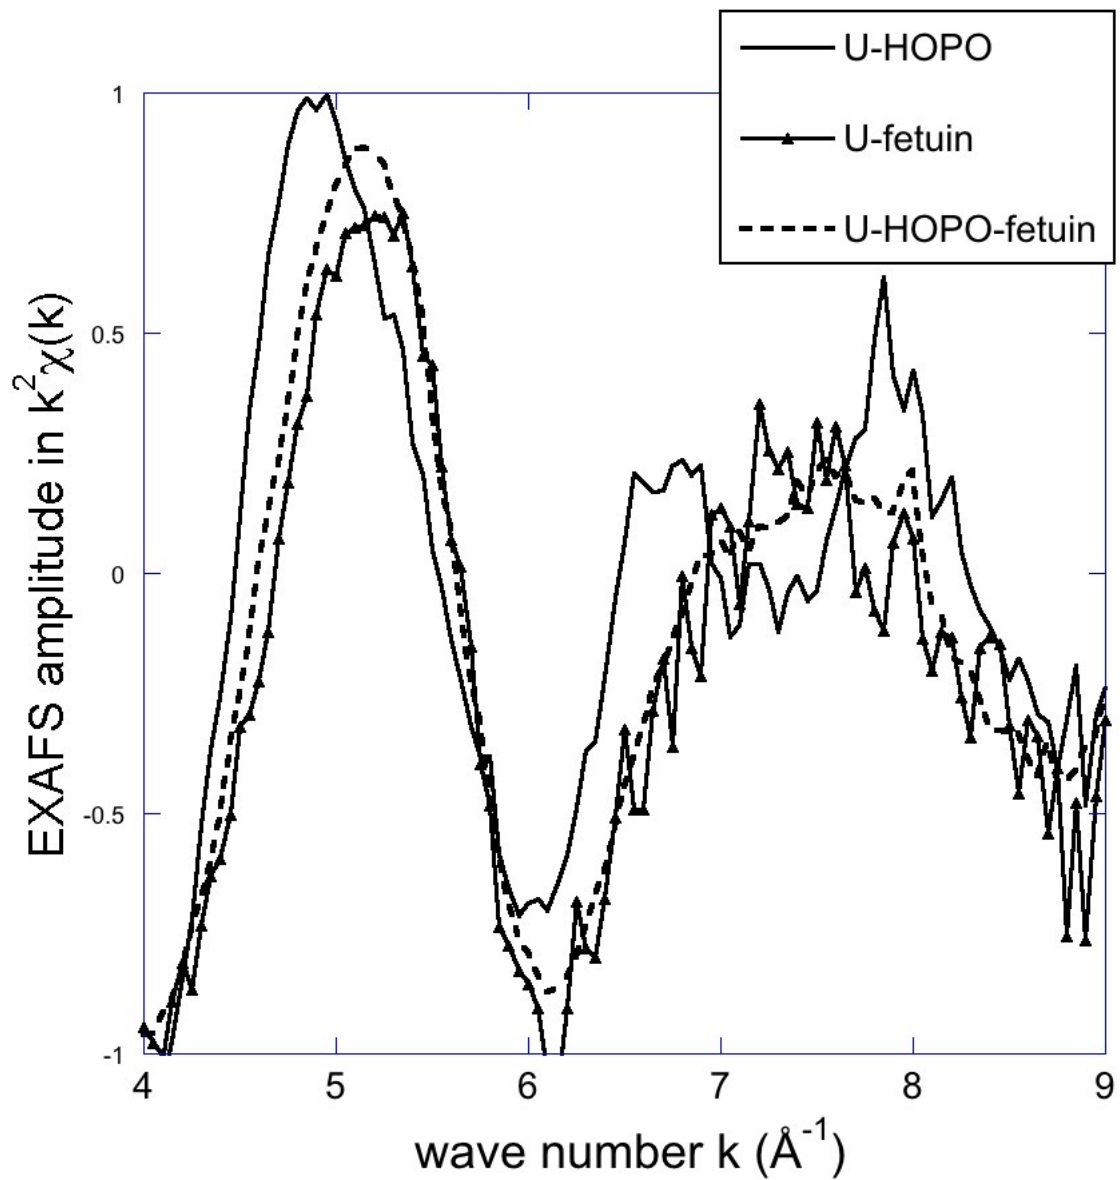

**Figure S4.** Comparison between the EXAFS spectra of U-HOPO, U-fetuin and U-HOPO-fetuin (enlarged spectral area between 4 and 9  $\text{\AA}^{-1}$ ).

#### IV. DFT calculations

**Table S2.** xyz coordinates of the two calculated structures presented in Fig. 3 (in Å)

- Without water molecule:

|   |             |             |             |
|---|-------------|-------------|-------------|
| C | 2.08799200  | 1.58084900  | 3.51463700  |
| C | 1.63408600  | 2.15470100  | 4.68312700  |
| C | 0.80984800  | 1.39287300  | 5.55370900  |
| C | 0.47790300  | 0.08977400  | 5.25779800  |
| C | 0.94760500  | -0.55540600 | 4.06864200  |
| N | 1.72688100  | 0.28486500  | 3.23406900  |
| H | 0.44648700  | 1.84500800  | 6.46917500  |
| H | 1.93524100  | 3.16229300  | 4.93381800  |
| H | -0.13757800 | -0.50680700 | 5.91868500  |
| O | 2.29907600  | -0.29669000 | 2.06035100  |
| O | 0.72307600  | -1.75999500 | 3.70878000  |
| C | 3.07532200  | 2.30823100  | 2.62658800  |
| O | 4.24170700  | 2.49848900  | 3.10597400  |
| N | 2.71132600  | 2.78994500  | 1.41649500  |
| C | 1.32514300  | 2.73974800  | 0.89068900  |
| H | 1.40020400  | 2.71993900  | -0.20057000 |
| H | 0.86147300  | 1.79459400  | 1.17705800  |
| C | -4.22008000 | -2.13835500 | 1.26281300  |
| C | -4.61027900 | -3.17719900 | 2.10187600  |
| C | -3.84681600 | -4.35625100 | 2.18168900  |
| C | -2.68647900 | -4.48809900 | 1.43371200  |
| C | -2.27536300 | -3.43748500 | 0.59020700  |
| N | -3.07359300 | -2.30560700 | 0.51831700  |
| H | -4.16032100 | -5.15798900 | 2.83863900  |
| H | -5.50595500 | -3.03557100 | 2.68814300  |
| H | -2.06234100 | -5.36998500 | 1.48201200  |
| O | -2.61330300 | -1.33908400 | -0.38832100 |
| O | -1.20006100 | -3.41323500 | -0.15570300 |
| C | -5.04847700 | -0.88152300 | 1.23058400  |
| O | -6.06047100 | -0.81676200 | 2.00749600  |
| N | -4.70168600 | 0.11615100  | 0.39197000  |
| H | -3.86150600 | -0.02822200 | -0.17743000 |
| C | -5.47308500 | 1.36851400  | 0.32649900  |
| H | -5.45517000 | 1.71862400  | -0.70757500 |
| H | -6.50356200 | 1.11778100  | 0.58293400  |
| C | -1.91391600 | 2.80677700  | -2.41409000 |
| C | -1.50737100 | 3.75268100  | -3.34750200 |
| C | -0.37820600 | 3.50238400  | -4.15374800 |
| C | 0.32947300  | 2.31696800  | -4.01932700 |
| C | -0.08849700 | 1.34595900  | -3.08104500 |
| N | -1.23463200 | 1.62363100  | -2.33507100 |
| H | -0.06174500 | 4.24130600  | -4.87990600 |
| H | -2.07345700 | 4.66918100  | -3.43790200 |
| H | 1.20194100  | 2.09444300  | -4.61898800 |
| O | -1.65683100 | 0.60649900  | -1.47236500 |
| O | 0.47991200  | 0.19816900  | -2.82683200 |
| C | -3.12166800 | 3.08517300  | -1.55917000 |
| O | -4.21241900 | 3.34134400  | -2.17445700 |
| N | -3.01084000 | 3.17087400  | -0.21020400 |

|   |             |             |             |
|---|-------------|-------------|-------------|
| C | -4.18957200 | 3.61567400  | 0.58109600  |
| H | -3.83205300 | 4.33820400  | 1.32124700  |
| H | -4.85804400 | 4.14074100  | -0.10184400 |
| C | 4.45487100  | -1.62706800 | -0.79939000 |
| C | 5.31520900  | -2.65703100 | -0.43448500 |
| C | 4.82147800  | -3.96332600 | -0.25771700 |
| C | 3.47094100  | -4.23399700 | -0.43697500 |
| C | 2.58831700  | -3.19648600 | -0.80357700 |
| N | 3.12706300  | -1.92972500 | -0.98983300 |
| H | 5.49696100  | -4.75913900 | 0.03157600  |
| H | 6.35634600  | -2.41342400 | -0.28079000 |
| H | 3.05727500  | -5.22339900 | -0.29443400 |
| O | 2.20262000  | -0.98032500 | -1.43700100 |
| O | 1.29720500  | -3.29303100 | -1.00478600 |
| C | 4.98634000  | -0.22625300 | -0.94213300 |
| O | 6.24690700  | -0.04081800 | -0.86631800 |
| N | 4.10418900  | 0.78128800  | -1.12268000 |
| H | 3.13139900  | 0.49930600  | -1.28241700 |
| C | 4.55221900  | 2.17087900  | -1.31553300 |
| H | 3.78832200  | 2.68759800  | -1.90329200 |
| H | 5.46665700  | 2.14053000  | -1.91491600 |
| C | -4.95570800 | 2.47988300  | 1.28273200  |
| H | -4.34121900 | 2.02233200  | 2.06735000  |
| H | -5.80705800 | 2.94581600  | 1.79419500  |
| C | -1.75128300 | 2.94882600  | 0.54568000  |
| H | -2.04455800 | 2.75616400  | 1.58187200  |
| H | -1.28551100 | 2.03179000  | 0.18051000  |
| C | -0.79406500 | 4.15345200  | 0.49538100  |
| H | -1.31424500 | 5.05165500  | 0.85068000  |
| H | -0.51401500 | 4.35464900  | -0.54687200 |
| C | 0.47922500  | 3.94981400  | 1.33923700  |
| H | 0.22507300  | 3.83902900  | 2.40147900  |
| H | 1.08552700  | 4.86070700  | 1.26047800  |
| C | 3.69007800  | 3.65795500  | 0.69856800  |
| H | 4.12112100  | 4.35322700  | 1.42460900  |
| H | 3.11355200  | 4.24586000  | -0.02024700 |
| C | 4.85647200  | 2.93557200  | -0.00758200 |
| H | 5.35820700  | 2.26317500  | 0.69433600  |
| H | 5.58140700  | 3.72323800  | -0.25225800 |
| U | -0.27323700 | -1.46010000 | -1.24617300 |
| O | -0.84197815 | -2.19961017 | -2.79955712 |
| O | 0.21744205  | -0.80597229 | 0.38090782  |
| H | 1.53450100  | -0.64265900 | 1.50074700  |

- With two water molecules

|   |             |             |            |
|---|-------------|-------------|------------|
| C | 1.82058100  | -1.37471800 | 2.67562900 |
| C | 1.75038500  | -1.36351800 | 4.04884200 |
| C | 0.73385700  | -2.11604000 | 4.69568600 |
| C | -0.16262900 | -2.86653700 | 3.97087400 |
| C | -0.11251100 | -2.92566700 | 2.53809200 |
| N | 0.90697200  | -2.12418500 | 1.97460000 |
| H | 0.67265500  | -2.10076400 | 5.77746400 |
| H | 2.46592900  | -0.78389400 | 4.61530800 |
| H | -0.93272400 | -3.45447200 | 4.45252200 |
| O | 1.11475500  | -2.20357400 | 0.56397400 |
| O | -0.87836200 | -3.59962000 | 1.78042500 |



|   |             |             |             |
|---|-------------|-------------|-------------|
| C | 2.93703500  | -0.68843000 | 1.92274000  |
| O | 4.08693600  | -1.22117500 | 1.97513400  |
| N | 2.67962200  | 0.47418700  | 1.28192700  |
| C | 1.34986400  | 1.13920900  | 1.28053300  |
| H | 1.25144300  | 1.63702200  | 0.31143200  |
| H | 0.57891500  | 0.37053800  | 1.31997200  |
| C | -5.43088000 | -1.47502900 | 1.36024300  |
| C | -6.09957900 | -2.62395000 | 1.76079900  |
| C | -5.93234100 | -3.83063500 | 1.05729500  |
| C | -5.09585700 | -3.88811100 | -0.04668100 |
| C | -4.40630100 | -2.72925200 | -0.45477500 |
| N | -4.59892000 | -1.57007800 | 0.26678800  |
| H | -6.46321400 | -4.71738600 | 1.38050000  |
| H | -6.74964100 | -2.55415000 | 2.62014900  |
| H | -4.94671800 | -4.79699800 | -0.61285500 |
| O | -3.87394500 | -0.47247200 | -0.22218900 |
| O | -3.59175600 | -2.62809600 | -1.47116300 |
| C | -5.66431900 | -0.19277600 | 2.11309300  |
| O | -6.41178000 | -0.23438000 | 3.14177800  |
| N | -5.10775700 | 0.94544100  | 1.65733800  |
| H | -4.48943500 | 0.87404600  | 0.84499300  |
| C | -5.35797700 | 2.24065600  | 2.31123500  |
| H | -5.34605500 | 3.00321500  | 1.53019500  |
| H | -6.36229300 | 2.20407300  | 2.73507000  |
| C | -1.89729400 | 3.75546800  | -0.55543000 |
| C | -1.22155000 | 4.86423900  | -1.04542600 |
| C | -0.37570100 | 4.73142000  | -2.16237200 |
| C | -0.22253800 | 3.49914700  | -2.78218600 |
| C | -0.92735400 | 2.38262600  | -2.29328500 |
| N | -1.74962300 | 2.56384600  | -1.20158300 |
| H | 0.15925000  | 5.59576300  | -2.53541500 |
| H | -1.34662700 | 5.81615500  | -0.54821800 |
| H | 0.42226500  | 3.36169000  | -3.63862800 |
| O | -2.44323100 | 1.42464200  | -0.77681200 |
| O | -0.88457000 | 1.16294900  | -2.77458900 |
| C | -2.82520400 | 3.90179900  | 0.62269700  |
| O | -3.81629000 | 4.68426800  | 0.47969000  |
| N | -2.51466600 | 3.29888700  | 1.79596900  |
| C | -3.29515900 | 3.64975000  | 3.01268700  |
| H | -2.57863000 | 3.80693000  | 3.82410700  |
| H | -3.79650500 | 4.59645000  | 2.81198300  |
| C | 8.40024000  | 0.37909000  | -0.39194600 |
| C | 9.24718100  | 1.47223900  | -0.25934900 |
| C | 10.56864900 | 1.28950300  | 0.18154300  |
| C | 11.02537700 | 0.02101300  | 0.48212000  |
| C | 10.19518500 | -1.13322400 | 0.35794100  |
| N | 8.87046400  | -0.88992700 | -0.09350600 |
| H | 11.22669600 | 2.14499400  | 0.28661300  |
| H | 8.85447400  | 2.44862500  | -0.50142800 |
| H | 12.03864400 | -0.14885100 | 0.82483600  |
| O | 8.05047700  | -2.02016600 | -0.23459300 |
| O | 10.57710800 | -2.33124000 | 0.62312700  |
| C | 6.98152200  | 0.64571900  | -0.84620900 |
| O | 6.66862900  | 1.83660400  | -1.18588800 |
| N | 6.14248900  | -0.40420000 | -0.85846000 |
| H | 6.62676300  | -1.29643100 | -0.63993800 |
| C | 4.70891400  | -0.44645700 | -1.20462200 |

|   |             |             |             |
|---|-------------|-------------|-------------|
| H | 4.29826000  | -1.27746300 | -0.62564500 |
| H | 4.61235700  | -0.70932300 | -2.26614400 |
| C | -4.32321700 | 2.57919800  | 3.41887700  |
| H | -3.81382600 | 1.65912300  | 3.72666400  |
| H | -4.84428200 | 2.95704800  | 4.30666000  |
| C | -1.34942600 | 2.38916000  | 1.97915200  |
| H | -1.57678100 | 1.77523700  | 2.85490600  |
| H | -1.31499900 | 1.71324300  | 1.12473300  |
| C | -0.01165500 | 3.12519500  | 2.19173300  |
| H | -0.09797400 | 3.79450900  | 3.05550800  |
| H | 0.20506500  | 3.75436200  | 1.32064900  |
| C | 1.16758400  | 2.15364400  | 2.43027300  |
| H | 1.01638900  | 1.60702500  | 3.36924000  |
| H | 2.08660900  | 2.73853700  | 2.54934800  |
| C | 3.77968500  | 1.19385500  | 0.58174200  |
| H | 4.71187700  | 0.98695700  | 1.10862300  |
| H | 3.57205800  | 2.26189700  | 0.67822500  |
| C | 3.87944900  | 0.81491500  | -0.91153100 |
| H | 4.29873900  | 1.66433300  | -1.45041200 |
| H | 2.87081700  | 0.63802400  | -1.30505400 |
| U | -2.23867700 | -0.72724400 | -1.99620500 |
| O | -3.38531000 | -0.29403700 | -3.32506400 |
| O | -1.06425475 | -1.27390174 | -0.71483477 |
| H | 0.24086100  | -1.97673600 | 0.11811900  |
| O | -1.76601000 | -2.96951500 | -3.21627900 |
| H | -1.97566600 | -2.98549200 | -4.16901700 |
| H | -2.02012600 | -3.81316200 | -2.79681200 |
| O | -0.30897700 | -1.02934100 | -3.56895500 |
| H | 0.14133600  | -0.20072300 | -3.81566900 |
| H | 0.25023700  | -1.82429400 | -3.60598300 |
